# Supplementary material for: A Ratiometric Fiber Optic Sensor Based on CdTe QDs Functionalized with Glutathione and Mercaptopropionic Acid for On-Site Monitoring of Antibiotic Ciprofloxacin in Aquaculture Water
Source: MDPI journal article supplement (doi:10.3390/nano12050829), 2022-03-01
Supplement: s1 [file s1]

# A Ratiometric Fiber Optic Sensor Based on CdTe QDs Functionalized with Glutathione and Mercaptopropionic Acid for On-Site Monitoring of Antibiotic Ciprofloxacin in Aquaculture Water

Xiao-Lin Yuan <sup>1</sup>, Xiao-Yi Wu <sup>1,2</sup>, Miao He <sup>1</sup>, Jia-Ping Lai <sup>1,\*</sup>, and Hui Sun <sup>2,\*</sup>

<sup>1</sup> School of Chemistry, South China Normal University, Guangzhou 510006, China; 2018022153@m.scnu.edu.cn (X.-L.Y.); 2112004007@e.gzhu.edu.cn (X.-Y.W.); 2018022147@m.scnu.edu.cn (M.H.)

<sup>2</sup> College of Environmental Science & Engineering, Guangzhou University, Guangzhou 510006, China

\* Correspondence: 20081223@m.scnu.edu.cn (J.-P.L.); esesunhui@gzhu.edu.cn (H.S.)

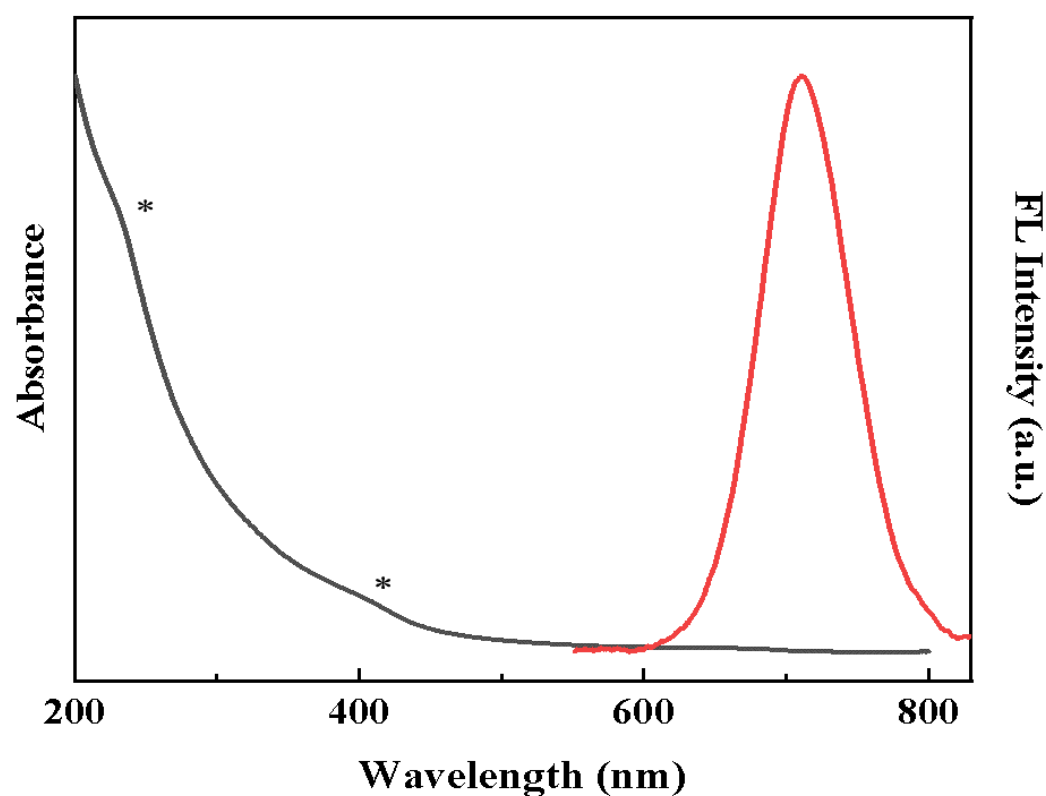

Figure S1. UV-absorption spectra and fluorescence emission spectra of GMPA@CdTe QDs.

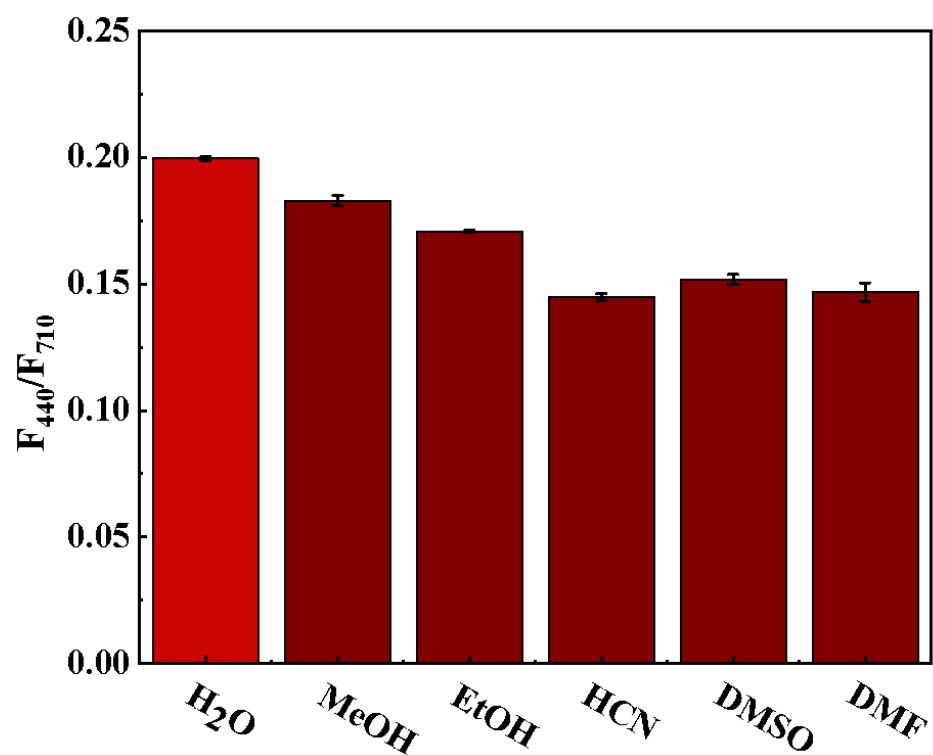

Figure S2. The influence of solvents on the signal of F440/F710.

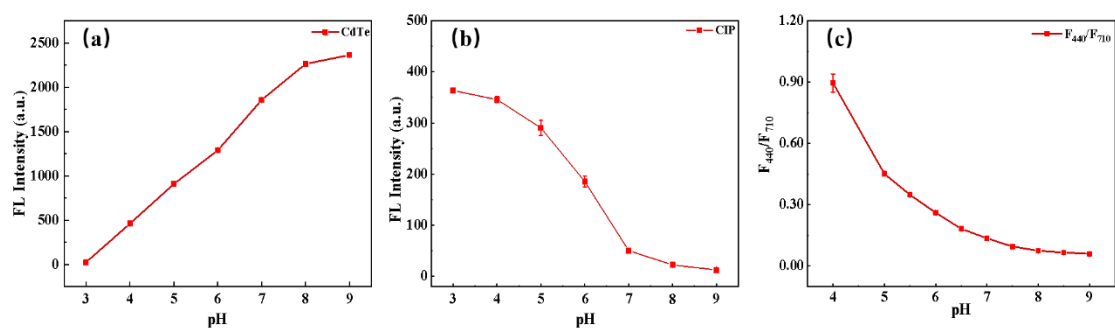

Figure S3. The influence of pH to the interaction between GMPA@CdTe QDs and CIP.

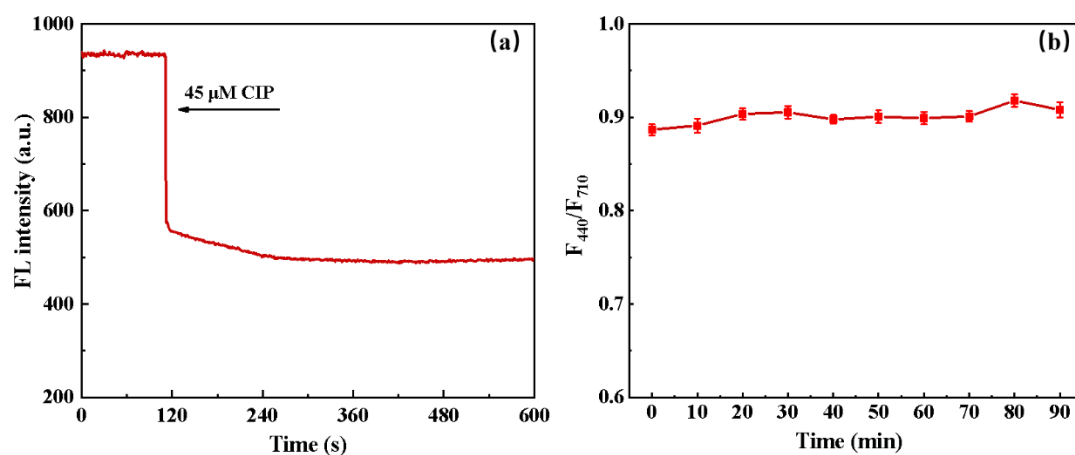

Figure S4. (a) The response time of the interaction between GMPA@CdTe QDs and CIP; (b) The stability of the fluorescence ratio ( $F_{440}/F_{710}$ ) of GMPA@CdTe QDs in PBS.

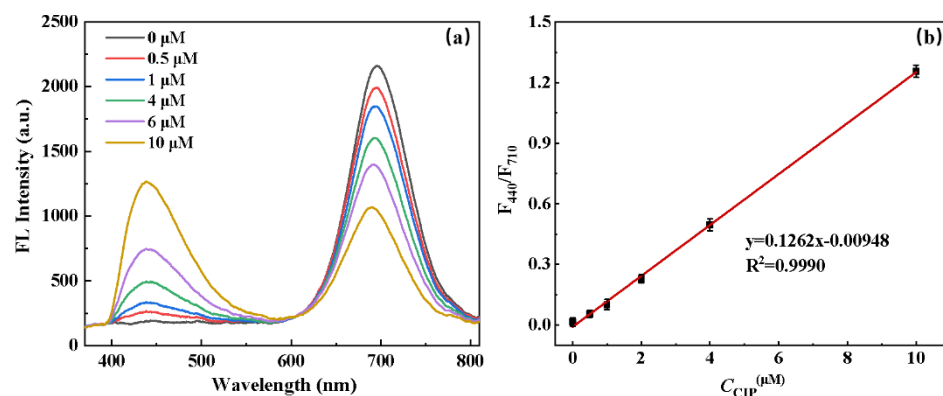

**Figure S5.** (a) Fluorescence spectra of the GMPA@CdTe QDs in the presence of various concentrations of CIP (0-10  $\mu\text{M}$ ); (b) The influence of CIP (0-10  $\mu\text{M}$ ) to the interaction between F440/F710 (FL-4600) ( $n=3$ ).

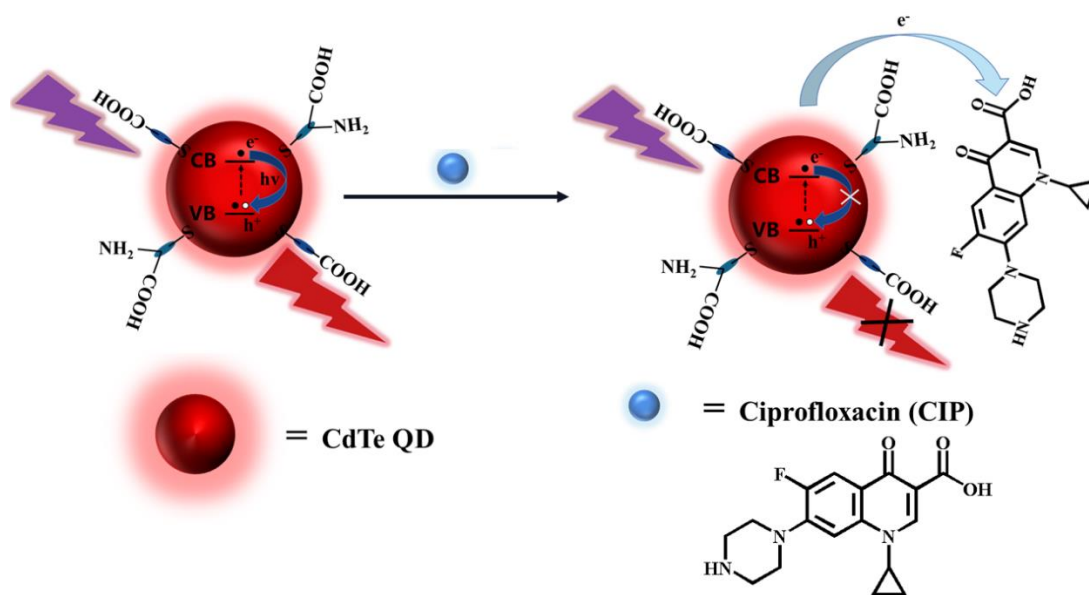

**Figure S6.** Schematic illustration of GMPA@CdTe QDs quenching by CIP.
